# Supplementary material for: Human NK cells adapt their immune response towards increasing multiplicities of infection of Aspergillus fumigatus
Source: Springer Nature journal article supplement (doi:10.1186/s12865-018-0276-6), 2018-12-01
Supplement: MOESM1 [file 16350310]

PBMC

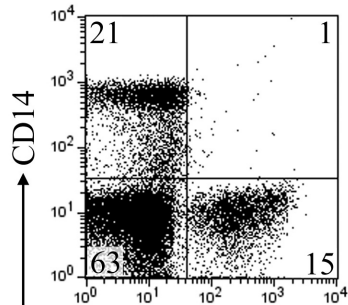

CD3

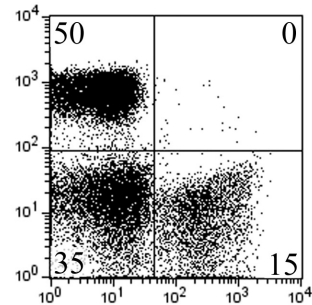

CD19

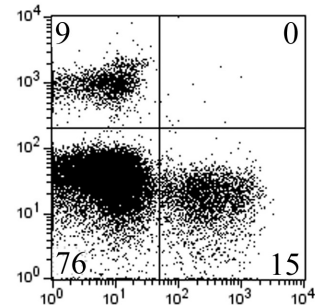

PBMC  
w/o  
NK cells

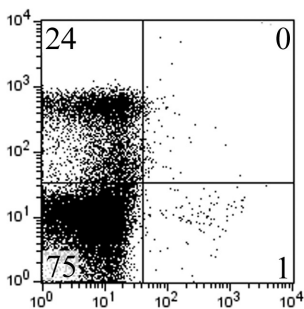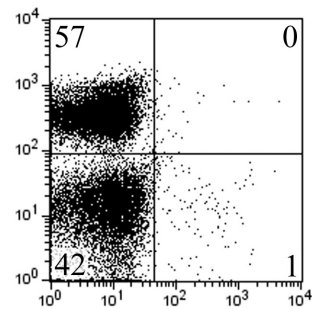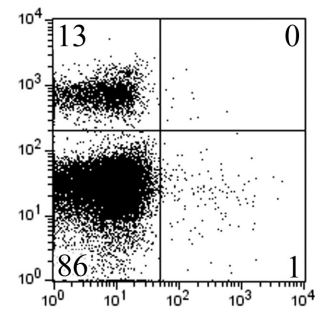

NK cells

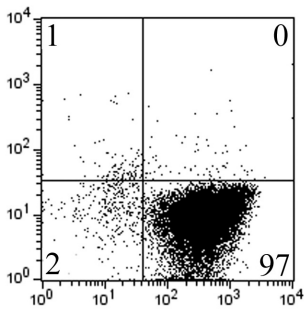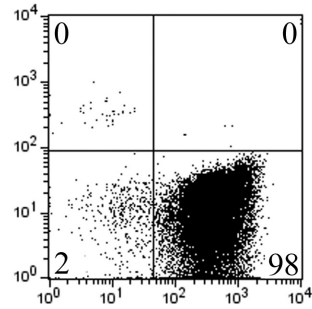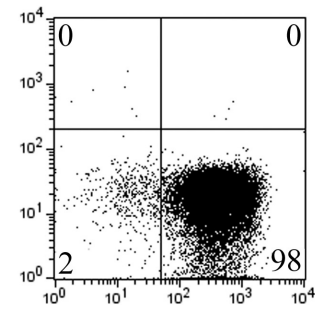

NKp46
